# Supplementary material
Source: Springer Nature journal article supplement (https://www.springermedizin.de/resource/supplementary/12889_2012_5052_MOESM1_ESM.pdf/9493042)
Supplement: MOESM1 [file 9493042]

Couples  
identified

DARI 1; couple  
interviews &  
repeat HIV test  
for negative

DARI 2;  
intervention; 4  
interactive  
group sessions

DARI 3; couple  
interviews and  
re-test HIV-  
negative

Enrolment. . . Months 1-2. . . . Months 2-8 ... . . . Months 8-12  
in main study
